# Supplementary material
Source: PubMed Central journal article supplement (PMC1201359)
Supplement: 7600782s2.pdf [file 7600782s2.pdf]

**Supplementary Table 1.** Yeast strains used in this study

| Strain    | Genotype                                                                                                                                    | Source                    |
|-----------|---------------------------------------------------------------------------------------------------------------------------------------------|---------------------------|
| L972      | <i>leu1 h<sup>-</sup></i>                                                                                                                   | Lab Stock                 |
| KSP4-25   | <i>pmo25::ura4<sup>+</sup>/pmo25<sup>+</sup> leu1/leu1 ura4/ura4</i><br><i>ade6-M216/ade6-M210 h<sup>-</sup>/h<sup>+</sup> pREP41-Pmo25</i> | This study                |
| KSP1-1    | <i>pmo25<sup>+</sup>:GFP:kan<sup>r</sup> h<sup>-</sup></i>                                                                                  | This study                |
| VS2933    | <i>cdc7<sup>+</sup>:GFP:kan<sup>r</sup> leu1 ura4 ade6 h<sup>-</sup></i>                                                                    | V. Simanis                |
| MS192     | <i>sad1<sup>+</sup>:dsRED:LEU2 leu1 h<sup>-</sup></i>                                                                                       | O. Niwa                   |
| DH797-3B  | <i>pmo25<sup>+</sup>:GFP:kan<sup>r</sup> sad1<sup>+</sup>:dsRED:LEU2 leu1 h<sup>-</sup></i>                                                 | This study                |
| DH820-2D  | <i>pmo25<sup>+</sup>:GFP:kan<sup>r</sup> cdc7<sup>+</sup>:GFP:kan<sup>r</sup> ura4 ade6 h<sup>-</sup></i>                                   | This study                |
| DH614-6A  | <i>nak1<sup>+</sup>:HA:kan<sup>r</sup> leu1 h<sup>-</sup></i>                                                                               | This study                |
| DH841-1D  | <i>pmo25<sup>+</sup>:GFP:kan<sup>r</sup> nak1<sup>+</sup>:HA:kan<sup>r</sup> leu1</i>                                                       | This study                |
| YS78-1    | <i>mor2<sup>+</sup>:HA:kan<sup>r</sup> h<sup>-</sup></i>                                                                                    | Hirata <i>et al.</i> 2002 |
| KK6-1     | <i>orb6<sup>+</sup>:HA:kan<sup>r</sup> h<sup>-</sup></i>                                                                                    | This study                |
| DH445-10D | <i>mor2<sup>+</sup>:HA:kan<sup>r</sup> orb6<sup>+</sup>:HA:kan<sup>r</sup></i>                                                              | This study                |
| DH107-4C  | <i>mor2-786 leu1 h<sup>-</sup></i>                                                                                                          | Hirata <i>et al.</i> 2002 |
| DH630-1   | <i>pmo25-35:GFP:kan<sup>r</sup> h<sup>-</sup></i>                                                                                           | This study                |
| DH842-1D  | <i>pmo25-35:ura4<sup>+</sup> ura4 h<sup>-</sup></i>                                                                                         | This study                |
| KP1-6D    | <i>nak1-125/mor4-125 leu1 h<sup>-</sup></i>                                                                                                 | This study                |
| Cdc10     | <i>cdc10-129 h<sup>-</sup></i>                                                                                                              | P. Nurse                  |
| Cdc25     | <i>cdc25-22 h<sup>+</sup></i>                                                                                                               | P. Nurse                  |
| DH92-2B   | <i>cdc10-129 mor2-786 h<sup>-</sup></i>                                                                                                     | This study                |
| DH93-2A   | <i>cdc25-22 mor2-786</i>                                                                                                                    | This study                |
| DH907-1C  | <i>cdc10-129 pmo25-35:ura4<sup>+</sup> ura4 h<sup>-</sup></i>                                                                               | This study                |
| DH908-3A  | <i>cdc25-22 pmo25-35:ura4<sup>+</sup> ura4 h<sup>-</sup></i>                                                                                | This study                |
| DH947-2A  | <i>cdc10-129 nak1-125 leu1 his2 h<sup>+</sup></i>                                                                                           | This study                |
| DH910-2B  | <i>cdc25-22 nak1-125 leu1 his2 h<sup>+</sup></i>                                                                                            | This study                |

|           |                                                                                                                 |                            |
|-----------|-----------------------------------------------------------------------------------------------------------------|----------------------------|
| Orb6      | <i>orb6-25 leu1 ade6 h<sup>-</sup></i>                                                                          | Verde <i>et al.</i> 1995   |
| DH433-12C | <i>orb6-25 leu1 h<sup>-</sup></i>                                                                               | This study                 |
| YS85      | <i>kan<sup>r</sup>:nmt1:GFP:mor2<sup>+</sup> h<sup>-</sup></i>                                                  | Hirata <i>et al.</i> 2002  |
| DH839-2   | <i>kan<sup>r</sup>:nmt1:GFP:mor2<sup>+</sup> pmo25-23:ura4<sup>+</sup> ura4</i>                                 | This study                 |
| DH807-1A  | <i>kan<sup>r</sup>:nmt1:GFP:mor2<sup>+</sup> nak1-125 leu1 h<sup>-</sup></i>                                    | This study                 |
| DH475-1C  | <i>kan<sup>r</sup>:nmt1:GFP:mor2<sup>+</sup> orb6-23 leu1 h<sup>-</sup></i>                                     | This study                 |
| DH847-3C  | <i>kan<sup>r</sup>:nmt1:GFP:mor2<sup>+</sup> cdc7-24 h<sup>-</sup></i>                                          | This study                 |
| DH789-1B  | <i>pmo25<sup>+</sup>:GFP:kan<sup>r</sup> mor2-786 h<sup>-</sup></i>                                             | This study                 |
| DH787-4A  | <i>pmo25<sup>+</sup>:GFP:kan<sup>r</sup> nak1-125 leu1 his2 h<sup>+</sup></i>                                   | This study                 |
| DH783-2C  | <i>pmo25<sup>+</sup>:GFP:kan<sup>r</sup> orb6-25 h<sup>-</sup></i>                                              | This study                 |
| DH852-7A  | <i>nak1<sup>+</sup>:HA:kan<sup>r</sup> pmo25-35:GFP:kan<sup>r</sup> leu1 ura4 ade6</i>                          | This study                 |
| DH853-6D  | <i>nak1<sup>+</sup>:HA:kan<sup>r</sup> mor2-786 leu1 ade6</i>                                                   | This study                 |
| DH850-3D  | <i>nak1<sup>+</sup>:HA:kan<sup>r</sup> orb6-25 leu1</i>                                                         | This study                 |
| YDM975    | <i>mob2<sup>+</sup>:Myc:kan<sup>r</sup> leu1 ura4 ade6 h<sup>-</sup></i>                                        | D. McCollum                |
| FV521     | <i>mob2<sup>+</sup>:Myc:kan<sup>r</sup> orb6<sup>+</sup>:HA:sup3-5 leu1 ura4 ade6-704</i>                       | Wiley <i>et al.</i> 2003   |
| DH957-8A  | <i>mob2<sup>+</sup>:Myc:kan<sup>r</sup> orb6<sup>+</sup>:HA:sup3-5 pmo25-35:ura4<sup>+</sup><br/>ura4</i>       | This study                 |
| DH990-2C  | <i>mob2<sup>+</sup>:Myc:kan<sup>r</sup> orb6<sup>+</sup>:HA:sup3-5 nak1-125<br/>leu1 ura4 ade6-704</i>          | This study                 |
| DH989-2B  | <i>mob2<sup>+</sup>:Myc:kan<sup>r</sup> orb6<sup>+</sup>:HA:sup3-5 mor2-786<br/>leu1 ade6-704</i>               | This study                 |
| KL284     | <i>orb3<sup>+</sup>/nak1<sup>+</sup>:GFP:kan<sup>r</sup> leu1 ura4 ade6 h<sup>-</sup></i>                       | Leonhard and Nurse<br>2005 |
| DH866-4C  | <i>nak1<sup>+</sup>:GFP:kan<sup>r</sup> leu1 h<sup>-</sup></i>                                                  | This study                 |
| DH867-2A  | <i>nak1<sup>+</sup>:GFP:kan<sup>r</sup> pmo25-35:ura4<sup>+</sup> leu1 ura4 his2 h<sup>+</sup></i>              | This study                 |
| DH967-1A  | <i>pmo25<sup>+</sup>:mRFP:kan<sup>r</sup> nak1<sup>+</sup>:GFP:kan<sup>r</sup> leu1 ura4 his2 h<sup>+</sup></i> | This study                 |
| DH821-1A  | <i>pmo25-35:ura4<sup>+</sup> cdc7<sup>+</sup>:GFP:kan<sup>r</sup> leu1 ura4 h<sup>-</sup></i>                   | This study                 |
| IH1297    | <i>cdc16-116 ura4 h<sup>-</sup></i>                                                                             | I. Hagan                   |
| Cdc7      | <i>cdc7-24 h<sup>+</sup></i>                                                                                    | P. Nurse                   |

|           |                                                                                    |             |
|-----------|------------------------------------------------------------------------------------|-------------|
| KP553     | <i>cdc7-i10 leu1 h<sup>-</sup></i>                                                 | T. Kuno     |
| IH1469    | <i>sid1-239 leu1 ura4 ade6 h<sup>+</sup></i>                                       | I. Hagan    |
| IH1470    | <i>sid2-250 leu1 ura4 ade6 h<sup>+</sup></i>                                       | I. Hagan    |
| DH888-6C  | <i>pmo25<sup>+</sup>:GFP:kan<sup>r</sup> cdc16-116 h<sup>-</sup></i>               | This study  |
| DH798-6C  | <i>pmo25<sup>+</sup>:GFP:kan<sup>r</sup> cdc7-24 h<sup>-</sup></i>                 | This study  |
| DH1052-1A | <i>pmo25<sup>+</sup>:GFP:kan<sup>r</sup> cdc7-i10 leu1</i>                         | This study  |
| DH890-1B  | <i>pmo25<sup>+</sup>:GFP:kan<sup>r</sup> sid1-239</i>                              | This study  |
| DH891-2B  | <i>pmo25<sup>+</sup>:GFP:kan<sup>r</sup> sid2-250 leu1</i>                         | This study  |
| Cps1      | <i>cps1-12 h<sup>+</sup></i>                                                       | J. Ishiguro |
| DH1085-4B | <i>pmo25<sup>+</sup>:GFP:kan<sup>r</sup> cps1</i>                                  | This study  |
| DH851-1A  | <i>nak1<sup>+</sup>:HA:kan<sup>r</sup> cdc7-24 leu1</i>                            | This study  |
| DH922-2C  | <i>nak1<sup>+</sup>:HA:kan<sup>r</sup> sid1-239 leu1 ade6</i>                      | This study  |
| DH923-2D  | <i>nak1<sup>+</sup>:HA:kan<sup>r</sup> sid2-250 leu1</i>                           | This study  |
| KS1158    | <i>mto1/mod20::kan<sup>r</sup> leu1 ura4 ade6 h<sup>-</sup></i>                    | K. Sawin    |
| KGY3251   | <i>mto1/mbol::ura4<sup>+</sup> leu1 ura4 ade6 h<sup>-</sup></i>                    | K. Gould    |
| DH936-4A  | <i>mob2<sup>+</sup>:Myc:kan<sup>r</sup> leu1</i>                                   | This study  |
| DH948-8D  | <i>mob2<sup>+</sup>:Myc:kan<sup>r</sup> cdc7-24 leu1 ura4 h<sup>-</sup></i>        | This study  |
| DH949-3A  | <i>mob2<sup>+</sup>:Myc:kan<sup>r</sup> sid1-239 leu1 ura4 ade6</i>                | This study  |
| DH939-2B  | <i>mob2<sup>+</sup>:Myc:kan<sup>r</sup> sid2-250 leu1 ura4 ade6</i>                | This study  |
| DH1080-2C | <i>mob2<sup>+</sup>:Myc:kan<sup>r</sup> Δmto1::ura4<sup>+</sup> leu1 ura4 ade6</i> | This study  |

---
