# Supplementary material
Source: PubMed Central journal article supplement (PMC1201359)
Supplement: 7600782s4.pdf [file 7600782s4.pdf]

## **Supplementary information**

### **Supplementary Methods**

#### **Isolation of conditional lethal mutants with polarity defects**

Mutants that showed an altered morphology were selected visually by fluorescence microscopy after staining with Calcofluor white, as described previously (Hirata *et al.*, 1998; Radcliffe *et al.*, 1998). The isolated round mutants were further examined for sensitivity to the protein kinase inhibitor staurosporine (1.5  $\mu\text{g/ml}$ ). The temperature-sensitive (ts) *pmo25* mutant was created by error-prone PCR mutagenesis as follows:

The DNA fragments containing the *pmo25<sup>+</sup>:GFP:kan<sup>r</sup>* gene amplified by PCR from the *pmo25<sup>+</sup>:GFP:kan<sup>r</sup>* strain were integrated into the *pmo25<sup>+</sup>* locus in wild-type cells; and from the resultant *kan<sup>r</sup>* cells, the ts *pmo25-35* mutant was isolated at 36°C.

#### **Immunochemical and kinase assays**

Preparation of cell extracts, immunoprecipitation, immunodetection, and kinase assays were performed as previously described (Matsusaka *et al.*, 1995; Bähler and Nurse, 2001; Huang *et al.*, 2003; Wiley *et al.*, 2003). Immunoprecipitation was done by using anti-HA antibody (HA.11, BabCO), anti-GFP antibody (8362-1, Clontech), anti-Myc antibody (9E10, Calbiochem), and magnetizable beads conjugated to protein A or G (Dynabeads, DYNAL).

## **Microscopy techniques**

For the observation of Pmo25-GFP, the cells expressing Pmo25-GFP were fixed with methanol (-20°C) for 10 min and washed three times with PEM buffer (Alfa *et al.* 1993). Fixed-cell images were collected with an Axiophot 2 MOT (ZEISS), the ApoTome sectioning system, and AxioCam MRm CCD camera; and the images were further processed with AxioVision software. For time-lapse microscopy, a 35 mm glass-bottomed culture dish (MatTek Corporation, P35G-1.5-10-C) was coated with 100 µg/ml concanavalin A. The culture of logarithmically growing cells (50 µl) was deposited in the well for a couple of minutes and then removed. The dish was filled with 3 ml of EMM medium and the cells that were attached to the bottom of the well were subjected to microscopic analysis. Live-cell images were collected with an IX70 (OLYMPUS) and DeltaVision sectioning system. Cytological techniques were performed according to Matsusaka *et al.* (1995).

## **In vitro binding assay**

The expression plasmids for HA-Pmo25 or Myc-Nak1 proteins were generated as follow: An HA-tagged *pmo25* cDNA or Myc-tagged *nak1* cDNA was amplified from pACT2-HA-Pmo25 or pGBKT7-Myc-Nak1, respectively, by PCR. The PCR products were inserted into the *NotI* and *XhoI* sites of the plasmid pTWIN1. The HA-Pmo25 and Myc-Nak1 proteins were synthesized using IMPACT-TWIN System (New England Biolabs). The HA-Pmo25 protein (10 µg/ml) was incubated with Myc-Nak1 protein (10

$\mu\text{g/ml}$ ) in Buffer A (Boudeau *et al.*, 2004), which contained 50 mM Tris-HCl (pH7.5), 0.27 M Sucrose, 0.1 mM EDTA (pH8.0), 0.1%(v/v) mercaptoethanol and protease inhibitors, for 1 h at 4°C. The mixture was incubated in 1:1000 dilution of a mouse anti-HA antibody (HA.11, Babco) and magnetizable beads conjugated to protein A (Dynabeads, DYNAL) for 1.5 h at 4°C. The beads were washed three times with Buffer A, and the bound proteins were subjected to an immunoblot analysis.

### **Supplementary References**

Alfa, C., Fantes, P., Hyams, J., McLeod, M. and Warbrick, E. (1993) *Experiments with Fission Yeast: A Laboratory Course Manual*. Cold Spring Harbor Laboratory Press, Cold Spring Harbor, NY.

Bähler, J. and Nurse, P. (2001) Fission yeast Pom1p kinase activity is cell cycle regulated and essential for cellular symmetry during growth and division. *EMBO J.* **20**, 1064-1073.

Matsusaka, T., Hirata, D., Yanagida, M. and Toda, T. (1995) A novel protein kinase *ssp1<sup>+</sup>* is required for alteration of growth polarity and actin localization in fission yeast. *EMBO J.*, **14**, 3325-3338.

**Supplementary Table 1.** Yeast strains used in this study

| Strain    | Genotype                                                                                                                                    | Source                    |
|-----------|---------------------------------------------------------------------------------------------------------------------------------------------|---------------------------|
| L972      | <i>leu1 h<sup>-</sup></i>                                                                                                                   | Lab Stock                 |
| KSP4-25   | <i>pmo25::ura4<sup>+</sup>/pmo25<sup>+</sup> leu1/leu1 ura4/ura4</i><br><i>ade6-M216/ade6-M210 h<sup>-</sup>/h<sup>+</sup> pREP41-Pmo25</i> | This study                |
| KSP1-1    | <i>pmo25<sup>+</sup>:GFP:kan<sup>r</sup> h<sup>-</sup></i>                                                                                  | This study                |
| VS2933    | <i>cdc7<sup>+</sup>:GFP:kan<sup>r</sup> leu1 ura4 ade6 h<sup>-</sup></i>                                                                    | V. Simanis                |
| MS192     | <i>sad1<sup>+</sup>:dsRED:LEU2 leu1 h<sup>-</sup></i>                                                                                       | O. Niwa                   |
| DH797-3B  | <i>pmo25<sup>+</sup>:GFP:kan<sup>r</sup> sad1<sup>+</sup>:dsRED:LEU2 leu1 h<sup>-</sup></i>                                                 | This study                |
| DH820-2D  | <i>pmo25<sup>+</sup>:GFP:kan<sup>r</sup> cdc7<sup>+</sup>:GFP:kan<sup>r</sup> ura4 ade6 h<sup>-</sup></i>                                   | This study                |
| DH614-6A  | <i>nak1<sup>+</sup>:HA:kan<sup>r</sup> leu1 h<sup>-</sup></i>                                                                               | This study                |
| DH841-1D  | <i>pmo25<sup>+</sup>:GFP:kan<sup>r</sup> nak1<sup>+</sup>:HA:kan<sup>r</sup> leu1</i>                                                       | This study                |
| YS78-1    | <i>mor2<sup>+</sup>:HA:kan<sup>r</sup> h<sup>-</sup></i>                                                                                    | Hirata <i>et al.</i> 2002 |
| KK6-1     | <i>orb6<sup>+</sup>:HA:kan<sup>r</sup> h<sup>-</sup></i>                                                                                    | This study                |
| DH445-10D | <i>mor2<sup>+</sup>:HA:kan<sup>r</sup> orb6<sup>+</sup>:HA:kan<sup>r</sup></i>                                                              | This study                |
| DH107-4C  | <i>mor2-786 leu1 h<sup>-</sup></i>                                                                                                          | Hirata <i>et al.</i> 2002 |
| DH630-1   | <i>pmo25-35:GFP:kan<sup>r</sup> h<sup>-</sup></i>                                                                                           | This study                |
| DH842-1D  | <i>pmo25-35:ura4<sup>+</sup> ura4 h<sup>-</sup></i>                                                                                         | This study                |
| KP1-6D    | <i>nak1-125/mor4-125 leu1 h<sup>-</sup></i>                                                                                                 | This study                |
| Cdc10     | <i>cdc10-129 h<sup>-</sup></i>                                                                                                              | P. Nurse                  |
| Cdc25     | <i>cdc25-22 h<sup>+</sup></i>                                                                                                               | P. Nurse                  |
| DH92-2B   | <i>cdc10-129 mor2-786 h<sup>-</sup></i>                                                                                                     | This study                |
| DH93-2A   | <i>cdc25-22 mor2-786</i>                                                                                                                    | This study                |
| DH907-1C  | <i>cdc10-129 pmo25-35:ura4<sup>+</sup> ura4 h<sup>-</sup></i>                                                                               | This study                |
| DH908-3A  | <i>cdc25-22 pmo25-35:ura4<sup>+</sup> ura4 h<sup>-</sup></i>                                                                                | This study                |
| DH947-2A  | <i>cdc10-129 nak1-125 leu1 his2 h<sup>+</sup></i>                                                                                           | This study                |
| DH910-2B  | <i>cdc25-22 nak1-125 leu1 his2 h<sup>+</sup></i>                                                                                            | This study                |

|           |                                                                                                                 |                            |
|-----------|-----------------------------------------------------------------------------------------------------------------|----------------------------|
| Orb6      | <i>orb6-25 leu1 ade6 h<sup>-</sup></i>                                                                          | Verde <i>et al.</i> 1995   |
| DH433-12C | <i>orb6-25 leu1 h<sup>-</sup></i>                                                                               | This study                 |
| YS85      | <i>kan<sup>r</sup>:nmt1:GFP:mor2<sup>+</sup> h<sup>-</sup></i>                                                  | Hirata <i>et al.</i> 2002  |
| DH839-2   | <i>kan<sup>r</sup>:nmt1:GFP:mor2<sup>+</sup> pmo25-23:ura4<sup>+</sup> ura4</i>                                 | This study                 |
| DH807-1A  | <i>kan<sup>r</sup>:nmt1:GFP:mor2<sup>+</sup> nak1-125 leu1 h<sup>-</sup></i>                                    | This study                 |
| DH475-1C  | <i>kan<sup>r</sup>:nmt1:GFP:mor2<sup>+</sup> orb6-23 leu1 h<sup>-</sup></i>                                     | This study                 |
| DH847-3C  | <i>kan<sup>r</sup>:nmt1:GFP:mor2<sup>+</sup> cdc7-24 h<sup>-</sup></i>                                          | This study                 |
| DH789-1B  | <i>pmo25<sup>+</sup>:GFP:kan<sup>r</sup> mor2-786 h<sup>-</sup></i>                                             | This study                 |
| DH787-4A  | <i>pmo25<sup>+</sup>:GFP:kan<sup>r</sup> nak1-125 leu1 his2 h<sup>+</sup></i>                                   | This study                 |
| DH783-2C  | <i>pmo25<sup>+</sup>:GFP:kan<sup>r</sup> orb6-25 h<sup>-</sup></i>                                              | This study                 |
| DH852-7A  | <i>nak1<sup>+</sup>:HA:kan<sup>r</sup> pmo25-35:GFP:kan<sup>r</sup> leu1 ura4 ade6</i>                          | This study                 |
| DH853-6D  | <i>nak1<sup>+</sup>:HA:kan<sup>r</sup> mor2-786 leu1 ade6</i>                                                   | This study                 |
| DH850-3D  | <i>nak1<sup>+</sup>:HA:kan<sup>r</sup> orb6-25 leu1</i>                                                         | This study                 |
| YDM975    | <i>mob2<sup>+</sup>:Myc:kan<sup>r</sup> leu1 ura4 ade6 h<sup>-</sup></i>                                        | D. McCollum                |
| FV521     | <i>mob2<sup>+</sup>:Myc:kan<sup>r</sup> orb6<sup>+</sup>:HA:sup3-5 leu1 ura4 ade6-704</i>                       | Wiley <i>et al.</i> 2003   |
| DH957-8A  | <i>mob2<sup>+</sup>:Myc:kan<sup>r</sup> orb6<sup>+</sup>:HA:sup3-5 pmo25-35:ura4<sup>+</sup><br/>ura4</i>       | This study                 |
| DH990-2C  | <i>mob2<sup>+</sup>:Myc:kan<sup>r</sup> orb6<sup>+</sup>:HA:sup3-5 nak1-125<br/>leu1 ura4 ade6-704</i>          | This study                 |
| DH989-2B  | <i>mob2<sup>+</sup>:Myc:kan<sup>r</sup> orb6<sup>+</sup>:HA:sup3-5 mor2-786<br/>leu1 ade6-704</i>               | This study                 |
| KL284     | <i>orb3<sup>+</sup>/nak1<sup>+</sup>:GFP:kan<sup>r</sup> leu1 ura4 ade6 h<sup>-</sup></i>                       | Leonhard and Nurse<br>2005 |
| DH866-4C  | <i>nak1<sup>+</sup>:GFP:kan<sup>r</sup> leu1 h<sup>-</sup></i>                                                  | This study                 |
| DH867-2A  | <i>nak1<sup>+</sup>:GFP:kan<sup>r</sup> pmo25-35:ura4<sup>+</sup> leu1 ura4 his2 h<sup>+</sup></i>              | This study                 |
| DH967-1A  | <i>pmo25<sup>+</sup>:mRFP:kan<sup>r</sup> nak1<sup>+</sup>:GFP:kan<sup>r</sup> leu1 ura4 his2 h<sup>+</sup></i> | This study                 |
| DH821-1A  | <i>pmo25-35:ura4<sup>+</sup> cdc7<sup>+</sup>:GFP:kan<sup>r</sup> leu1 ura4 h<sup>-</sup></i>                   | This study                 |
| IH1297    | <i>cdc16-116 ura4 h<sup>-</sup></i>                                                                             | I. Hagan                   |
| Cdc7      | <i>cdc7-24 h<sup>+</sup></i>                                                                                    | P. Nurse                   |

|           |                                                                                    |             |
|-----------|------------------------------------------------------------------------------------|-------------|
| KP553     | <i>cdc7-i10 leu1 h<sup>-</sup></i>                                                 | T. Kuno     |
| IH1469    | <i>sid1-239 leu1 ura4 ade6 h<sup>+</sup></i>                                       | I. Hagan    |
| IH1470    | <i>sid2-250 leu1 ura4 ade6 h<sup>+</sup></i>                                       | I. Hagan    |
| DH888-6C  | <i>pmo25<sup>+</sup>:GFP:kan<sup>r</sup> cdc16-116 h<sup>-</sup></i>               | This study  |
| DH798-6C  | <i>pmo25<sup>+</sup>:GFP:kan<sup>r</sup> cdc7-24 h<sup>-</sup></i>                 | This study  |
| DH1052-1A | <i>pmo25<sup>+</sup>:GFP:kan<sup>r</sup> cdc7-i10 leu1</i>                         | This study  |
| DH890-1B  | <i>pmo25<sup>+</sup>:GFP:kan<sup>r</sup> sid1-239</i>                              | This study  |
| DH891-2B  | <i>pmo25<sup>+</sup>:GFP:kan<sup>r</sup> sid2-250 leu1</i>                         | This study  |
| Cps1      | <i>cps1-12 h<sup>+</sup></i>                                                       | J. Ishiguro |
| DH1085-4B | <i>pmo25<sup>+</sup>:GFP:kan<sup>r</sup> cps1</i>                                  | This study  |
| DH851-1A  | <i>nak1<sup>+</sup>:HA:kan<sup>r</sup> cdc7-24 leu1</i>                            | This study  |
| DH922-2C  | <i>nak1<sup>+</sup>:HA:kan<sup>r</sup> sid1-239 leu1 ade6</i>                      | This study  |
| DH923-2D  | <i>nak1<sup>+</sup>:HA:kan<sup>r</sup> sid2-250 leu1</i>                           | This study  |
| KS1158    | <i>mto1/mod20::kan<sup>r</sup> leu1 ura4 ade6 h<sup>-</sup></i>                    | K. Sawin    |
| KGY3251   | <i>mto1/mbol::ura4<sup>+</sup> leu1 ura4 ade6 h<sup>-</sup></i>                    | K. Gould    |
| DH936-4A  | <i>mob2<sup>+</sup>:Myc:kan<sup>r</sup> leu1</i>                                   | This study  |
| DH948-8D  | <i>mob2<sup>+</sup>:Myc:kan<sup>r</sup> cdc7-24 leu1 ura4 h<sup>-</sup></i>        | This study  |
| DH949-3A  | <i>mob2<sup>+</sup>:Myc:kan<sup>r</sup> sid1-239 leu1 ura4 ade6</i>                | This study  |
| DH939-2B  | <i>mob2<sup>+</sup>:Myc:kan<sup>r</sup> sid2-250 leu1 ura4 ade6</i>                | This study  |
| DH1080-2C | <i>mob2<sup>+</sup>:Myc:kan<sup>r</sup> Δmto1::ura4<sup>+</sup> leu1 ura4 ade6</i> | This study  |

---

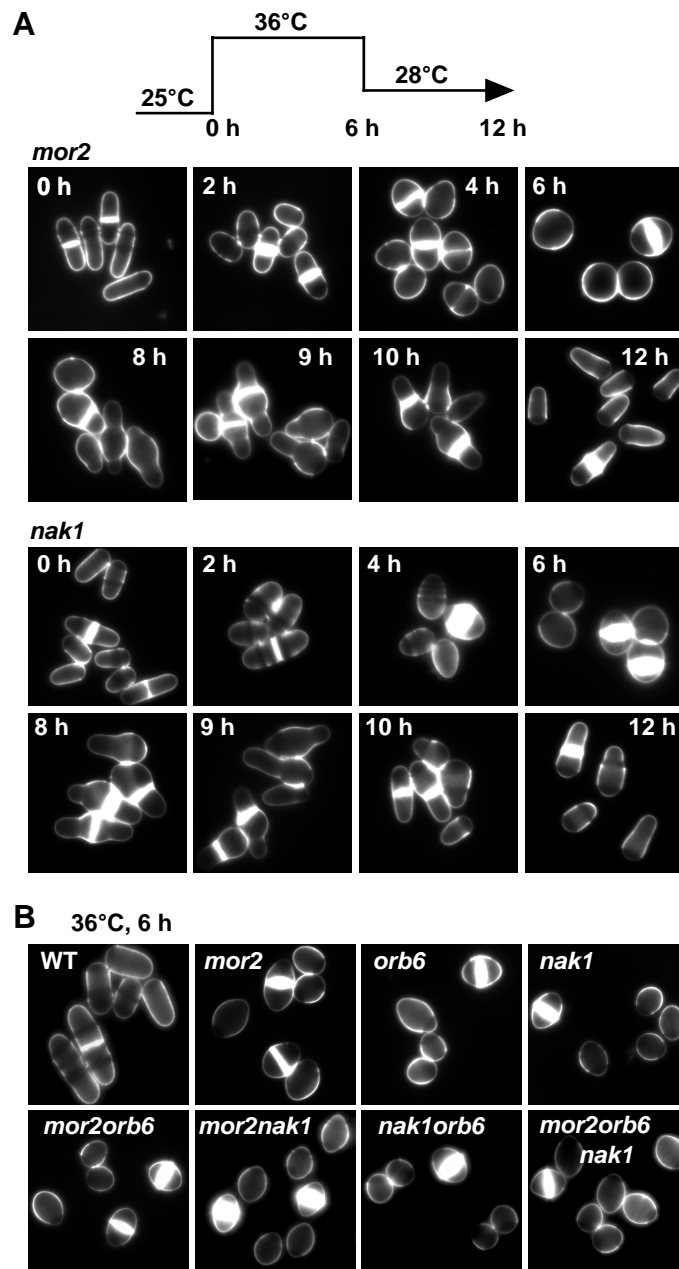

Supplementary  
Figure 1
